# Supplementary material for: Kinetic modelling of acyl glucuronide and glucoside reactivity and development of structure–property relationships
Source: Royal Society of Chemistry journal article supplement (doi:10.1039/c9ob02008j), 2020-01-01
Supplement: c9ob02008j1.pdf [file c9ob02008j1.pdf]

Bradshaw *et al.*

**Kinetic Modelling of Acyl Glucuronide and Glucoside Reactivity and  
Development of Structure-Property Relationships**

Peter R. Bradshaw,<sup>a</sup> Selena E. Richards,<sup>b</sup> Ian D. Wilson,<sup>a</sup> Andrew V. Stachulski,<sup>c</sup>

John C. Lindon,<sup>a</sup> Toby J. Athersuch<sup>a</sup>

<sup>a</sup> Department of Metabolism, Digestion and Reproduction, Faculty of Medicine,  
Imperial College London, Sir Alexander Fleming Building, South Kensington,  
London, SW7 2AZ UK.

<sup>b</sup> Department of Chemistry, Khalifa University of Science and Technology, Abu  
Dhabi, United Arab Emirates

<sup>c</sup> Department of Chemistry, The Robert Robinson Laboratories, University of  
Liverpool, Liverpool L69 7ZD UK.

† To whom correspondence should be addressed.

E-mail: toby.athersuch@imperial.ac.uk

Phone: +44 (0)20 7594 3806

## 1. Structures of Acyl Glucosides, Molecular Descriptors and Atomic Distances of Optimised of Acyl Glucosides

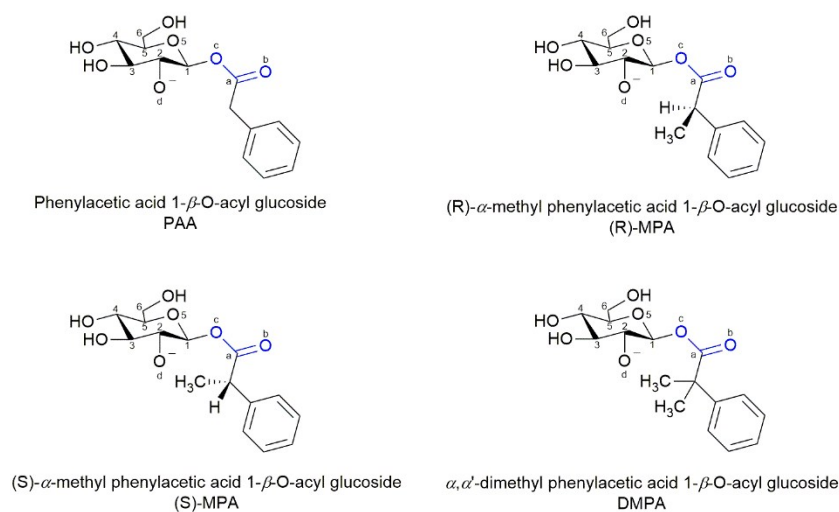

**Supplementary Figure 1.** Chemical structures of acyl glucoside conjugates, the ester bond (blue), carbonyl carbon (a), carbonyl oxygen (b), acyl carbon (c) and alkoxide oxygen (d) are highlighted

**Supplementary Table 1.** Physicochemical descriptors for each acyl glucoside ground state and transition structures

| Property                      | Ground States |         |         |         | Transition Structures |         |         |          |
|-------------------------------|---------------|---------|---------|---------|-----------------------|---------|---------|----------|
|                               | PAA           | (R)-MPA | (S)-MPA | DMPA    | PAA                   | (R)-MPA | (S)-MPA | DMPA     |
| Partial atomic charge:        |               |         |         |         |                       |         |         |          |
| Carbonyl Carbon (a)           | 0.849         | 0.853   | 0.853   | 0.855   | 0.819                 | 0.824   | 0.820   | 0.827    |
| Carbonyl Oxygen (b)           | -0.617        | -0.628  | -0.629  | -0.611  | -0.698                | -0.711  | -0.719  | -0.723   |
| Acyl Oxygen (c)               | -0.543        | -0.536  | -0.536  | -0.552  | -0.655                | -0.625  | -0.632  | -0.678   |
| Alkoxide Oxygen (d)           | -0.893        | -0.892  | -0.895  | -0.893  | -0.731                | -0.745  | -0.741  | -0.698   |
| $E_{\text{HOMO}}$ (Hartree)   | -0.203        | -0.203  | -0.203  | -0.203  | -0.226                | -0.226  | -0.220  | -0.223   |
| $E_{\text{LUMO}}$ (Hartree)   | -0.023        | -0.026  | -0.027  | -0.026  | -0.015                | -0.013  | -0.014  | -0.011   |
| Activation energy (kcal/mol)  | N/A           | N/A     | N/A     | N/A     | 8.53                  | 8.70    | 9.82    | 11.41    |
| Electron affinity (KJ/mol)    | 95.08         | 84.14   | 87.38   | 68.48   | 86.56                 | 54.66   | 54.88   | 58.24    |
| Electronegativity ( $\chi$ )  | -0.1131       | -0.1145 | -0.1149 | -0.1143 | -0.1205               | -0.1195 | -0.1169 | -0.1171  |
| Hardness ( $\eta$ )           | 0.0902        | 0.0888  | 0.0883  | 0.0886  | 0.1060                | 0.1061  | 0.1032  | 0.1057   |
| Electrophilicity ( $\omega$ ) | 0.0709        | 0.0738  | 0.0748  | 0.0737  | 0.0686                | 0.0673  | 0.0662  | 0.0649   |
| Softness (S)                  | 5.5448        | 5.6291  | 5.6638  | 5.6418  | 4.7190                | 4.7143  | 4.8471  | 4.7324   |
| $f^{\text{N}}$ (Carbonyl C)   | -8.668        | -21.585 | -23.484 | -24.306 | -58.251               | -75.283 | -30.648 | -142.389 |
| $f^{\text{E}}$ (Alkoxide O)   | -2.347        | -2.343  | -2.352  | -2.351  | -0.730                | -0.813  | -1.069  | -0.642   |
| PSA/CMSA                      | 0.429         | 0.407   | 0.403   | 0.395   | 0.442                 | 0.424   | 0.423   | 0.410    |

**Supplementary Table 2.** Key atomic distances (Å) for each acyl glucoside in the ground and transition structures optimised at the B3LYP/6-31G(d,p) level of theory. Distance **a** between the carbonyl carbon (a) and the alkoxide oxygen (d). Distance **b** between the carbonyl carbon (a) and carbon oxygen (b), refer to supplementary figure 1 for atom labels

| <b>PAA</b>        |      |             |             |             |      |      |             |      |             |             |
|-------------------|------|-------------|-------------|-------------|------|------|-------------|------|-------------|-------------|
| Bond Length       | GS1  | GS2         | <b>GS3</b>  | GS4         | GS5  | GS6  | <b>TS1</b>  | TS2  | TS3         |             |
| Distance <b>a</b> | 3.69 | 4.11        | <b>4.18</b> | 3.50        | 3.50 | 3.35 | <b>1.76</b> | 1.77 | 1.87        |             |
| Distance <b>b</b> | 1.21 | 1.21        | <b>1.21</b> | 1.21        | 1.21 | 1.21 | <b>1.22</b> | 1.22 | 1.22        |             |
| <b>(R)-MPA</b>    |      |             |             |             |      |      |             |      |             |             |
|                   | GS1  | <b>GS2</b>  | GS3         | GS4         | GS5  |      | TS1         | TS2  | <b>TS3</b>  |             |
| Distance <b>a</b> | 3.39 | <b>4.19</b> | 3.13        | 3.36        | 3.44 |      | 1.82        | 1.81 | <b>1.84</b> |             |
| Distance <b>b</b> | 1.21 | <b>1.22</b> | 1.21        | 1.21        | 1.21 |      | 1.22        | 1.22 | <b>1.23</b> |             |
| <b>(S)-MPA</b>    |      |             |             |             |      |      |             |      |             |             |
|                   | GS1  | <b>GS2</b>  | GS3         | GS4         | GS5  |      | TS1         | TS2  | TS3         |             |
| Distance <b>a</b> | 3.30 | <b>4.04</b> | 3.38        | 3.73        | 3.17 |      | <b>1.84</b> | 1.64 | 1.86        |             |
| Distance <b>b</b> | 1.21 | <b>1.22</b> | 1.21        | 1.21        | 1.21 |      | <b>1.23</b> | 1.22 | 1.22        |             |
| <b>DMPA</b>       |      |             |             |             |      |      |             |      |             |             |
|                   | GS1  | GS2         | GS3         | GS4         | GS5  | GS6  | GS7         | GS8  | GS9         | <b>GS10</b> |
| Distance <b>a</b> | 2.96 | 3.53        | 3.51        | 2.95        | 3.22 | 3.40 | 3.44        | 2.95 | 3.73        | <b>4.10</b> |
| Distance <b>b</b> | 1.22 | 1.21        | 1.21        | 1.21        | 1.21 | 1.21 | 1.21        | 1.21 | 1.21        | <b>1.21</b> |
|                   | TS1  | TS2         | TS3         | <b>TS4</b>  | TS5  | TS6  |             |      |             |             |
| Distance <b>a</b> | 1.77 | 1.75        | 1.80        | <b>1.66</b> | 1.92 | 1.91 |             |      |             |             |
| Distance <b>b</b> | 1.23 | 1.23        | 1.23        | <b>1.23</b> | 1.22 | 1.22 |             |      |             |             |

Lowest energy conformers indicated in bold in the table. GS - Ground state, TS - Transition structure

## 2. Cartesian Coordinates of the Lowest Energy Ground States and Transition Structures for the Series of Acyl Glucosides

PAA Ground state

Energy: -1070.481480 Hartree (B3LYP/6-31++G(d,p) SCRF=water) 0 imaginary freq (B3LYP/6-31G(d,p))

|   |             |             |             |   |             |             |             |
|---|-------------|-------------|-------------|---|-------------|-------------|-------------|
| C | -3.41482500 | -1.19909800 | -0.43576400 | O | -1.77637800 | -2.88093800 | -0.22646800 |
| C | -2.05339000 | -1.64574300 | 0.19451300  | C | 1.23173100  | 0.00058300  | 0.13113500  |
| C | -1.08354200 | -0.49905800 | -0.15759200 | O | 1.26816700  | 0.78102400  | -0.79758000 |
| C | -2.85600300 | 1.15504900  | -0.16530000 | C | 2.40694000  | -0.29372700 | 1.06805500  |
| C | -3.92213600 | 0.09728600  | 0.15351600  | H | 2.28950700  | 0.40302100  | 1.91055000  |
| H | -2.17978400 | -1.52916500 | 1.31308700  | H | 2.27128400  | -1.29537900 | 1.48209100  |
| H | -3.24368700 | -1.02298300 | -1.51826600 | O | 0.16307500  | -0.70006700 | 0.53237300  |
| H | -2.80317100 | 1.26959000  | -1.26035600 | C | 3.77886200  | -0.13896900 | 0.45390300  |
| H | -4.02253100 | -0.00352900 | 1.24595000  | C | 4.18906500  | 1.07134400  | -0.12481600 |
| H | -0.87815900 | -0.43367900 | -1.23357800 | C | 4.68291200  | -1.20788200 | 0.47473200  |
| O | -1.57147000 | 0.75395100  | 0.33847200  | C | 5.46855800  | 1.20396200  | -0.66231000 |
| C | -3.09884400 | 2.52442300  | 0.45247800  | H | 3.48877200  | 1.89752400  | -0.17186100 |
| H | -4.03199800 | 2.94124100  | 0.06224200  | C | 5.96558200  | -1.07680600 | -0.06098200 |
| H | -3.20448500 | 2.40735900  | 1.54436600  | H | 4.37583200  | -2.15421000 | 0.91306100  |
| O | -2.04241000 | 3.42066400  | 0.13220700  | C | 6.36374500  | 0.13213700  | -0.63084000 |
| O | -5.17293900 | 0.51407900  | -0.41472600 | H | 5.76697900  | 2.14815100  | -1.11045000 |
| H | -5.64447300 | -0.31808000 | -0.56800400 | H | 6.64995000  | -1.92077900 | -0.03472800 |
| O | -4.28587500 | -2.29371800 | -0.26367000 | H | 7.36092700  | 0.23856900  | -1.04980500 |
| H | -3.56114700 | -3.00090200 | -0.26038500 | H | -1.24311800 | 2.87229400  | 0.18685100  |

PAA transition structure

Energy: -1070.467791 Hartree (B3LYP/6-31++G(d,p) SCRF=water) 1 imaginary freq (B3LYP/6-31G(d,p))

|   |             |             |             |   |             |             |             |
|---|-------------|-------------|-------------|---|-------------|-------------|-------------|
| C | -1.83073400 | 1.57323400  | 0.33972900  | O | 0.45460100  | 0.69788800  | 0.60371300  |
| C | -0.78302500 | 0.51809300  | 0.02824100  | C | 1.08084600  | -0.94470400 | 0.75955200  |
| C | -1.28828500 | -0.82010600 | 0.54984400  | O | 1.52880700  | -1.14670900 | 1.87517800  |
| C | -3.51981500 | -0.28155800 | 0.03327300  | C | 1.94318900  | -1.08514100 | -0.51310000 |
| C | -3.12839400 | 1.15921600  | -0.35625800 | H | 2.05290400  | -2.16087500 | -0.69667100 |
| H | -0.73612300 | 0.41883500  | -1.07966100 | H | 1.39390600  | -0.67398100 | -1.36636400 |
| H | -2.00451500 | 1.60146500  | 1.42836500  | O | -0.24464400 | -1.69320200 | 0.39190500  |
| H | -3.78132500 | -0.28361500 | 1.10498500  | C | 3.31047900  | -0.44780000 | -0.41307900 |
| H | -2.94947400 | 1.19280200  | -1.44336500 | C | 3.45119600  | 0.91703100  | -0.11177100 |
| H | -1.60018900 | -0.73572800 | 1.61225100  | C | 4.47267100  | -1.19324000 | -0.64714000 |
| O | -2.45466600 | -1.20935500 | -0.20288900 | C | 4.71192500  | 1.50822900  | -0.05528300 |
| C | -4.70394300 | -0.82025600 | -0.76254000 | H | 2.54905800  | 1.48500700  | 0.09337700  |
| H | -5.59757500 | -0.22759700 | -0.54715100 | C | 5.73826000  | -0.60357200 | -0.59297500 |
| H | -4.47948000 | -0.72318700 | -1.83863800 | H | 4.38339400  | -2.25363800 | -0.87296400 |
| O | -4.97118600 | -2.16949900 | -0.41332600 | C | 5.86352900  | 0.75354000  | -0.29840200 |
| O | -4.21149400 | 2.02639600  | -0.01239800 | H | 4.79910500  | 2.56590800  | 0.18423500  |
| H | -3.83557900 | 2.91775000  | -0.04980500 | H | 6.62444900  | -1.20684400 | -0.77815200 |
| O | -1.47067500 | 2.88015600  | -0.11898000 | H | 6.84591600  | 1.21801600  | -0.25286000 |
| H | -0.52801200 | 2.95293600  | 0.09607300  | H | -4.08979700 | -2.57044500 | -0.33983200 |

## (R)-MPA Ground state

Energy: -1109.797739 Hartree (B3LYP/6-31++G(d,p) SCRF=water) 0 imaginary freq (B3LYP/6-31G(d,p))

|   |             |             |             |   |             |             |             |
|---|-------------|-------------|-------------|---|-------------|-------------|-------------|
| C | -3.26427700 | -1.51412200 | -0.31312500 | C | 1.10344400  | 0.51293800  | 0.09267100  |
| C | -1.85727000 | -1.65238800 | 0.36025200  | O | 1.00310000  | 1.20172400  | -0.90547800 |
| C | -1.08291500 | -0.41351000 | -0.13465400 | C | 2.33205100  | 0.52719100  | 1.00972300  |
| C | -3.10063700 | 0.91489900  | -0.33251200 | O | 0.17165500  | -0.32087000 | 0.56769400  |
| C | -3.98562400 | -0.25663200 | 0.11608200  | H | 2.12406500  | -0.15837800 | 1.83502300  |
| H | -2.01768100 | -1.42118000 | 1.45644900  | C | 3.59445900  | 0.05403600  | 0.30071000  |
| H | -3.10844400 | -1.44434500 | -1.41008400 | C | 4.00690800  | 0.60668800  | -0.92118800 |
| H | -3.04996300 | 0.90453700  | -1.43355700 | C | 4.39771900  | -0.92817400 | 0.89367800  |
| H | -4.08664400 | -0.24039900 | 1.21302800  | C | 5.19223900  | 0.18790800  | -1.52489600 |
| H | -0.87475400 | -0.44476800 | -1.21177200 | H | 3.37376000  | 1.34368500  | -1.40297100 |
| O | -1.77639600 | 0.79133500  | 0.21054300  | C | 5.58612200  | -1.34542000 | 0.29216400  |
| C | -3.57055500 | 2.29104200  | 0.11629900  | H | 4.08402300  | -1.37528300 | 1.83362400  |
| H | -4.55433500 | 2.49967900  | -0.31437000 | C | 5.98959400  | -0.78620400 | -0.92026700 |
| H | -3.66895400 | 2.29097600  | 1.21512000  | H | 5.49153500  | 0.62158400  | -2.47563600 |
| O | -2.67027900 | 3.30192700  | -0.31864500 | H | 6.19097600  | -2.11249600 | 0.76868500  |
| O | -5.27791700 | -0.12109700 | -0.49454700 | H | 6.91229400  | -1.11120800 | -1.39372500 |
| H | -5.60643600 | -1.03114600 | -0.54144000 | C | 2.50305000  | 1.95429300  | 1.57460800  |
| O | -3.94666600 | -2.70775500 | -0.00440400 | H | 2.64661300  | 2.67009700  | 0.76106700  |
| H | -3.11530500 | -3.28005900 | 0.08232300  | H | 1.61512300  | 2.25438900  | 2.14052600  |
| O | -1.37856700 | -2.86825600 | 0.09312700  | H | 3.37146400  | 2.00036100  | 2.23904400  |
|   |             |             |             | H | -1.79263100 | 2.90262700  | -0.20491900 |

## (R)-MPA Transition structure

Energy: -1109.783814 Hartree (B3LYP/6-31++G(d,p) SCRF=water) 1 imaginary freq (B3LYP/6-31G(d,p))

|   |             |             |             |   |             |             |             |
|---|-------------|-------------|-------------|---|-------------|-------------|-------------|
| C | -2.63857400 | -1.31418600 | -0.49751100 | O | 1.39022800  | -1.31240700 | 1.89829700  |
| C | -1.39483800 | -1.10208800 | 0.34893800  | C | 1.97574400  | -1.04509800 | -0.43459800 |
| C | -0.87144300 | 0.29747500  | 0.06499900  | O | 0.32518300  | 0.38964700  | 0.73963000  |
| C | -3.03823600 | 1.16374600  | -0.22567100 | H | 1.39847100  | -0.81026600 | -1.33381200 |
| C | -3.65803900 | -0.24449700 | -0.10590900 | C | 3.13665300  | -0.06417700 | -0.34704500 |
| H | -1.71549000 | -1.10292700 | 1.41372200  | C | 3.52748700  | 0.67138700  | -1.47446200 |
| H | -2.38194700 | -1.18504500 | -1.56317500 | C | 3.87590600  | 0.10146300  | 0.83590900  |
| H | -2.84074700 | 1.35807200  | -1.29382200 | C | 4.62097600  | 1.53902100  | -1.43393200 |
| H | -3.93795300 | -0.41700900 | 0.94572600  | H | 2.96218200  | 0.56217700  | -2.39766900 |
| H | -0.74247300 | 0.45058900  | -1.02853000 | C | 4.96578000  | 0.97009100  | 0.88078000  |
| O | -1.81843100 | 1.27953500  | 0.51733900  | H | 3.55262900  | -0.44087500 | 1.71850500  |
| C | -3.94094700 | 2.26771100  | 0.31417700  | C | 5.34856800  | 1.69108100  | -0.25341000 |
| H | -4.85904800 | 2.31860500  | -0.27783400 | H | 4.90013700  | 2.09923500  | -2.32372500 |
| H | -4.21602800 | 2.02141000  | 1.35378200  | H | 5.51838800  | 1.08944500  | 1.81022100  |
| O | -3.29511200 | 3.52904200  | 0.23815500  | H | 6.19941200  | 2.36734700  | -0.21510700 |
| O | -4.82143000 | -0.29081600 | -0.93640900 | C | 2.48381300  | -2.49301200 | -0.54957300 |
| H | -5.03570200 | -1.23206100 | -1.00889400 | H | 3.00351600  | -2.77849900 | 0.36920800  |
| O | -3.22430800 | -2.60450200 | -0.30428100 | H | 1.63049500  | -3.16184800 | -0.68212000 |
| H | -2.45856300 | -3.18880300 | -0.18592500 | H | 3.17234700  | -2.60625500 | -1.39543000 |
| O | -0.34441700 | -1.95068700 | 0.11117400  | H | -2.38737200 | 3.34653500  | 0.53026200  |
| C | 1.03115900  | -0.94030300 | 0.78620500  |   |             |             |             |

## (S)-MPA Ground state

Energy: -1109.798900 Hartree (B3LYP/6-31++G(d,p) SCRF=water)

0 imaginary freq (B3LYP/6-31G(d,p))

|   |             |             |             |   |             |             |             |
|---|-------------|-------------|-------------|---|-------------|-------------|-------------|
| C | -3.63001700 | -0.78162600 | 0.10796500  | O | 1.04631800  | -0.63848100 | -1.87932400 |
| C | -2.27360000 | -1.43819400 | 0.52427000  | C | 2.40089700  | -1.52497400 | -0.07569900 |
| C | -1.21773200 | -0.66732100 | -0.29250800 | O | 0.09722100  | -1.05426900 | 0.14858900  |
| C | -2.54552400 | 1.36350700  | -0.30601000 | C | 3.37709800  | -0.38797600 | 0.20502600  |
| C | -3.68382500 | 0.68439900  | 0.47034600  | C | 3.71564000  | 0.54861500  | -0.78301900 |
| H | -2.07641500 | -1.09188700 | 1.58311700  | C | 3.99013900  | -0.28573300 | 1.46008000  |
| H | -3.71619200 | -0.85213700 | -0.99645400 | C | 4.64494800  | 1.55440600  | -0.51894100 |
| H | -2.76865600 | 1.28139000  | -1.38225300 | H | 3.22558300  | 0.49211100  | -1.74955600 |
| H | -3.51255600 | 0.80620000  | 1.55186800  | C | 4.92310600  | 0.71832800  | 1.72459900  |
| H | -1.29494700 | -0.86304400 | -1.36849300 | H | 3.72908900  | -0.99855800 | 2.23838300  |
| O | -1.28053100 | 0.73990300  | -0.02850600 | C | 5.25546500  | 1.64243800  | 0.73395900  |
| C | -2.33485400 | 2.83180400  | 0.03712900  | H | 4.88854100  | 2.27635800  | -1.29405300 |
| H | -3.23265500 | 3.39925200  | -0.22445500 | H | 5.38383400  | 0.78105000  | 2.70706300  |
| H | -2.17599500 | 2.92160600  | 1.12498600  | H | 5.97784300  | 2.42835700  | 0.93777900  |
| O | -1.23986000 | 3.37684700  | -0.68736700 | C | 3.03075300  | -2.59711200 | -0.98740200 |
| O | -4.92524000 | 1.30443400  | 0.10103500  | H | 3.96498900  | -2.96658000 | -0.55322200 |
| H | -5.58325000 | 0.61047500  | 0.25501900  | H | 2.34734600  | -3.44238700 | -1.11572900 |
| O | -4.63164700 | -1.56651700 | 0.71450200  | H | 3.24262800  | -2.17762900 | -1.97396600 |
| H | -4.09226500 | -2.42284800 | 0.73416700  | H | 2.12298100  | -1.98143700 | 0.87779400  |
| O | -2.37129100 | -2.75932000 | 0.36057900  | H | -0.56539300 | 2.67995300  | -0.65273500 |
| C | 1.11012900  | -1.01073100 | -0.72235200 |   |             |             |             |

## (S)-MPA Transition structure

Energy: -1109.782819 Hartree (B3LYP/6-31++G(d,p) SCRF=water)

1 imaginary freq (B3LYP/6-31G(d,p))

|   |             |             |             |   |             |             |             |
|---|-------------|-------------|-------------|---|-------------|-------------|-------------|
| C | 2.74139800  | -1.39453400 | -0.01242800 | O | -1.27173800 | -1.10904600 | 1.91931700  |
| C | 1.28878600  | -1.00218900 | -0.23609300 | C | -2.04577800 | -1.08264800 | -0.37961000 |
| C | 1.02170700  | 0.25268800  | 0.58267000  | O | -0.33927800 | 0.46394200  | 0.45825000  |
| C | 3.18686800  | 1.08003000  | 0.22680000  | C | -3.20172400 | -0.09323200 | -0.31787300 |
| C | 3.61401100  | -0.22774500 | -0.47474500 | C | -3.85412400 | 0.20064800  | 0.89082500  |
| H | 1.19644400  | -0.69393300 | -1.30362900 | C | -3.67638200 | 0.51717800  | -1.48682100 |
| H | 2.91084700  | -1.56065100 | 1.06481000  | C | -4.94377500 | 1.07019600  | 0.92082800  |
| H | 3.42233100  | 0.98134600  | 1.29977400  | H | -3.46395900 | -0.24295800 | 1.80132300  |
| H | 3.46756200  | -0.10862300 | -1.56062800 | C | -4.76964800 | 1.38552800  | -1.46071300 |
| H | 1.30680800  | 0.10263500  | 1.64242600  | H | -3.17662700 | 0.30938000  | -2.43052700 |
| O | 1.78666400  | 1.34741700  | 0.06759700  | C | -5.41198900 | 1.66446300  | -0.25405700 |
| C | 3.89296500  | 2.31519600  | -0.32080300 | H | -5.42872300 | 1.29008700  | 1.86949800  |
| H | 4.96873200  | 2.23765000  | -0.13994700 | H | -5.11539300 | 1.84752300  | -2.38296000 |
| H | 3.73078000  | 2.35918400  | -1.41133800 | H | -6.26231700 | 2.34195400  | -0.22765600 |
| O | 3.42052600  | 3.49150200  | 0.31701800  | C | -2.55603300 | -2.53111800 | -0.29134700 |
| O | 4.99759400  | -0.45186100 | -0.19044500 | H | -3.30548300 | -2.73553600 | -1.06528600 |
| H | 5.15151000  | -1.37711700 | -0.42986700 | H | -1.71039300 | -3.21197900 | -0.41160800 |
| O | 3.11657900  | -2.56834200 | -0.73894400 | H | -3.00431300 | -2.71044000 | 0.68982800  |
| H | 2.33674700  | -3.14079900 | -0.66012100 | H | -1.53228700 | -0.94547900 | -1.33550200 |
| O | 0.34432900  | -1.92061300 | 0.14499000  | H | 2.46009800  | 3.36096000  | 0.37169900  |
| C | -1.01791200 | -0.84232700 | 0.74627300  |   |             |             |             |

## DMPA Ground state

Energy: -1149.110398 Hartree (B3LYP/6-31++G(d,p) SCRF=water)

0 imaginary freq (B3LYP/6-31G(d,p))

|   |             |             |             |   |             |             |             |
|---|-------------|-------------|-------------|---|-------------|-------------|-------------|
| C | 3.59716700  | -0.76569700 | -0.18770800 | C | -2.47030600 | -1.44687600 | 0.22572800  |
| C | 2.22902500  | -1.40792900 | -0.58830900 | O | -0.11715600 | -1.11924300 | -0.03448400 |
| C | 1.21291100  | -0.76073700 | 0.37332400  | C | -3.12740500 | -0.11058000 | -0.18293800 |
| C | 2.50347200  | 1.29329800  | 0.53054500  | C | -2.39080400 | 0.84072700  | -0.91099500 |
| C | 3.59990300  | 0.73249400  | -0.38746100 | C | -4.46452800 | 0.18428500  | 0.11404800  |
| H | 1.95573400  | -0.94885100 | -1.58669600 | C | -2.97461700 | 2.03689900  | -1.32476600 |
| H | 3.75743900  | -0.95488400 | 0.89410600  | H | -1.34643900 | 0.65088100  | -1.13655400 |
| H | 2.79631900  | 1.09717700  | 1.57463800  | C | -5.05217500 | 1.37992600  | -0.30675500 |
| H | 3.35469100  | 0.96772400  | -1.43563500 | H | -5.06307400 | -0.51842800 | 0.68270200  |
| H | 1.35628800  | -1.07083300 | 1.41476700  | C | -4.31078400 | 2.31284100  | -1.02876000 |
| O | 1.23510900  | 0.67060300  | 0.26388200  | H | -2.37766300 | 2.75789400  | -1.87654600 |
| C | 2.24244200  | 2.78443800  | 0.36912300  | H | -6.09222000 | 1.58026100  | -0.06128500 |
| H | 3.14644500  | 3.34237000  | 0.62985700  | H | -4.76464000 | 3.24610700  | -1.35130000 |
| H | 2.00631300  | 2.98858200  | -0.68913200 | C | -3.28910600 | -2.21552000 | 1.27855600  |
| O | 1.19296000  | 3.21963000  | 1.22265700  | H | -4.25961600 | -2.52149500 | 0.87574000  |
| O | 4.85137400  | 1.33949800  | -0.03236600 | H | -2.75076800 | -3.12172000 | 1.57070300  |
| H | 5.51056900  | 0.68421700  | -0.30505100 | H | -3.44140300 | -1.61542600 | 2.17750500  |
| O | 4.57142100  | -1.45136800 | -0.94106900 | C | -2.29711000 | -2.33056500 | -1.03210600 |
| H | 4.04945800  | -2.31420400 | -1.02397900 | H | -1.77498100 | -3.25930200 | -0.78340400 |
| O | 2.36119700  | -2.73536900 | -0.58364600 | H | -3.28221900 | -2.57830900 | -1.44310200 |
| C | -1.10466200 | -1.11361900 | 0.87490700  | H | -1.71437100 | -1.82389300 | -1.80137200 |
| O | -0.97182500 | -0.87159100 | 2.05651400  | H | 0.52896600  | 2.51453600  | 1.16352300  |

## DMPA Transition structure

Energy: -1149.092148 Hartree (B3LYP/6-31++G(d,p) SCRF=water)

1 imaginary freq (B3LYP/6-31G(d,p))

|   |             |             |             |   |            |             |             |
|---|-------------|-------------|-------------|---|------------|-------------|-------------|
| C | -2.73514200 | -1.42297200 | -0.27124900 | C | 0.94957400 | -0.72784400 | -0.66137300 |
| C | -1.35592400 | -0.95834400 | 0.15547600  | O | 1.22615900 | -0.80340500 | -1.85299100 |
| C | -1.10171900 | 0.40638500  | -0.46998100 | C | 2.06950300 | -0.99481100 | 0.40998600  |
| C | -3.34900800 | 1.03564200  | -0.22253300 | O | 0.21952100 | 0.65289200  | -0.22299400 |
| C | -3.73829000 | -0.38526100 | 0.23952300  | C | 3.23816500 | -0.01783000 | 0.17416200  |
| H | -1.37812000 | -0.80108300 | 1.25290900  | C | 4.54478400 | -0.45494100 | -0.08709100 |
| H | -2.78598000 | -1.45856200 | -1.37165200 | C | 3.03400300 | 1.37210000  | 0.26625500  |
| H | -3.46884900 | 1.08001700  | -1.31796200 | C | 5.60368200 | 0.44480800  | -0.24115900 |
| H | -3.71300700 | -0.41475700 | 1.34120400  | H | 4.75097700 | -1.51513000 | -0.17892900 |
| H | -1.31639600 | 0.38801400  | -1.55830700 | C | 4.08632100 | 2.27198900  | 0.11137200  |
| O | -1.99777000 | 1.36398800  | 0.12478200  | H | 2.02728500 | 1.73991900  | 0.42579100  |
| C | -4.20356500 | 2.12831900  | 0.41037800  | C | 5.38295600 | 1.81598500  | -0.13879300 |
| H | -5.24606500 | 2.01073900  | 0.10124500  | H | 6.60309700 | 0.06561500  | -0.44445000 |
| H | -4.15733400 | 2.02187400  | 1.50778000  | H | 3.88991300 | 3.33967600  | 0.18137000  |
| O | -3.76135400 | 3.41256400  | -0.00015300 | H | 6.20376200 | 2.51933300  | -0.25904600 |
| O | -5.06103000 | -0.65948200 | -0.22597400 | C | 2.49327100 | -2.46058700 | 0.19388000  |
| H | -5.16677800 | -1.61617900 | -0.12156600 | H | 3.28081600 | -2.76267200 | 0.89524000  |
| O | -3.10813200 | -2.69804100 | 0.26463500  | H | 1.62313300 | -3.10062100 | 0.35113200  |
| H | -2.31862800 | -3.24748600 | 0.14869400  | H | 2.84110500 | -2.61288300 | -0.83074900 |
| O | -0.28874600 | -1.75174000 | -0.23613200 | C | 1.57309800 | -0.83635000 | 1.86133200  |

Bradshaw *et al.*

|   |            |             |            |   |             |            |            |
|---|------------|-------------|------------|---|-------------|------------|------------|
| H | 0.75758000 | -1.54025300 | 2.04726700 | H | 1.20170400  | 0.17265700 | 2.04602800 |
| H | 2.38533300 | -1.04656800 | 2.56892100 | H | -2.79297500 | 3.34642600 | 0.02459000 |
